# Supplementary material for: Expansion of the HSV-2–specific T cell repertoire in skin after immunotherapeutic HSV-2 vaccine
Source: PubMed Central journal article supplement (PMC11383358; doi:10.1172/jci.insight.179010), 2024-06-18

# Supplementary figures and tables

## 6.3.24

### **Supplementary Figures:**

**Supplemental Figure 1.** Experimental procedure to isolate HSV-reactive CD4+ T cells.

**Supplemental Figure 2.** All prevalent and elicited dose 1 and dose 2 expanding clonotypes from skin and cross-detection in blood and arm.

**Supplemental Figure 3.** TRBV and TRBJ gene usage in blood, arm, and genital skin.

**Supplemental Figure 4.** Determination of UL-49 reactivity and HLA-DP restriction of transgenic, vaccine-expanded immunodominant TCR from P4.

**Supplemental Figure 5.** Gating strategy and CMP results to identify HSV-specificity of clonotypes.

### **Supplementary Tables:**

**Supplemental Table 1.** Procedures and study visits.

**Supplemental Table 2.** Demographic characteristics of participants enrolled in the vaccine and preliminary arms.

**Supplemental Table 3.** Unique clonotypes identified as HSV-2-reactive in CD4+ T cells from blood and their detection in tissue.

**Supplemental Table 4a.** All prevalent clonotypes detected in blood and skin.

**Supplemental Table 4b.** All elicited clonotypes detected in blood and skin.

**Supplemental Table 5.** TRAV/TRAJ usage suggestive of MAIT cell derivation represent a small minority of the TCRa clonotypes detected in two participants over time.

**Supplemental Table 6a.** All prevalent clonotypes expanding over dose 1.

**Supplemental Table 6b.** All elicited clonotypes expanding over dose 1.

**Supplemental Table 6c.** All clonotypes expanding over dose 2.

**Supplemental Table 7.** Detection of HSV-2 by genital-area swab (viral shedding) by study day.

**Supplemental Table 8.** All HSV-specific clonotypes from P4.

**Supplemental Table 9.** Paired HSV-specific TCR sequences with antigen specificity from P4.

**Supplemental Table 10.** Sequence similar TCR clusters

Supplementary Figure 1.

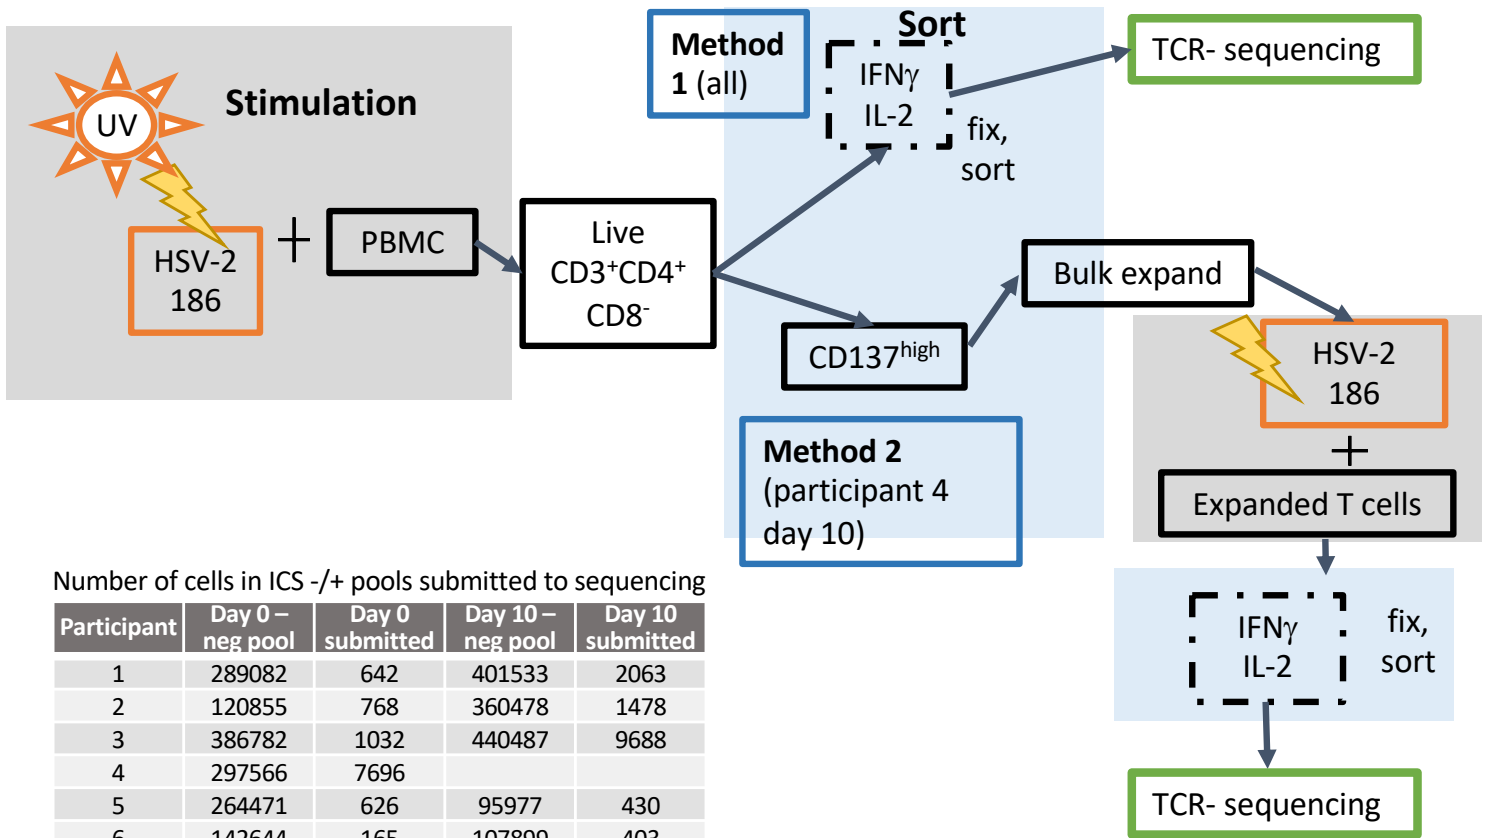

Number of cells in ICS +/- pools submitted to sequencing

| Participant | Day 0 – neg pool | Day 0 submitted | Day 10 – neg pool | Day 10 submitted |
|-------------|------------------|-----------------|-------------------|------------------|
| 1           | 289082           | 642             | 401533            | 2063             |
| 2           | 120855           | 768             | 360478            | 1478             |
| 3           | 386782           | 1032            | 440487            | 9688             |
| 4           | 297566           | 7696            |                   |                  |
| 5           | 264471           | 626             | 95977             | 430              |
| 6           | 142644           | 165             | 107899            | 403              |
| 7           | 238454           | 125             | 124473            | 343              |
| 8           | NA               | NA              | 451953            | 13161            |
| 9           | NA               | NA              | 314766            | 10686            |

Example – Method 1  
ICS fix/sort, Participant 2

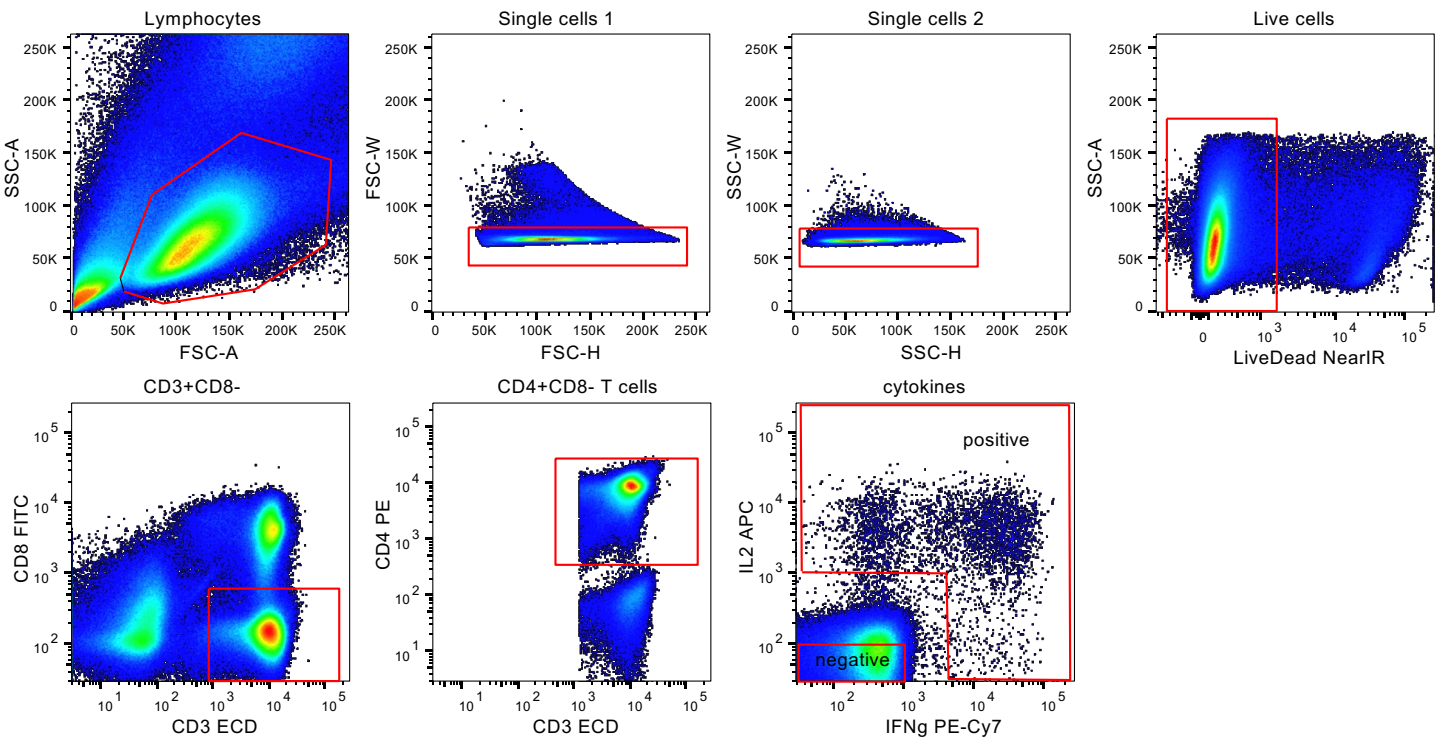



Supplementary Figure 2. All prevalent and elicited clonotypes expanding over dose 2

c. Prevalent clonotypes

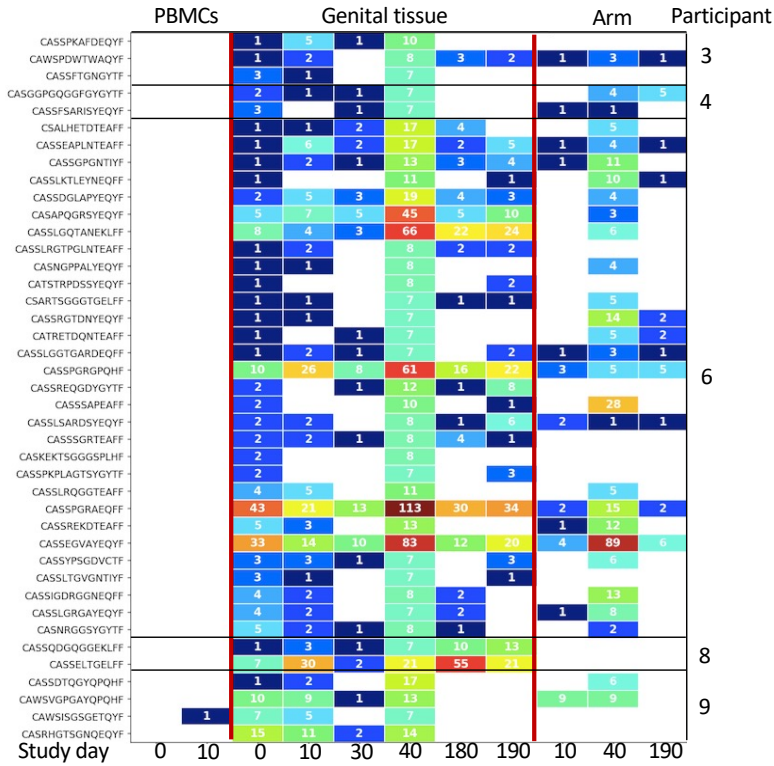

d. Elicited clonotypes

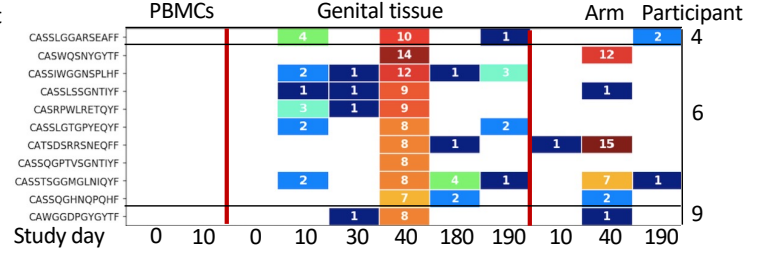



Supplementary Figure 3 – TRBV and TRBJ usage in all participants

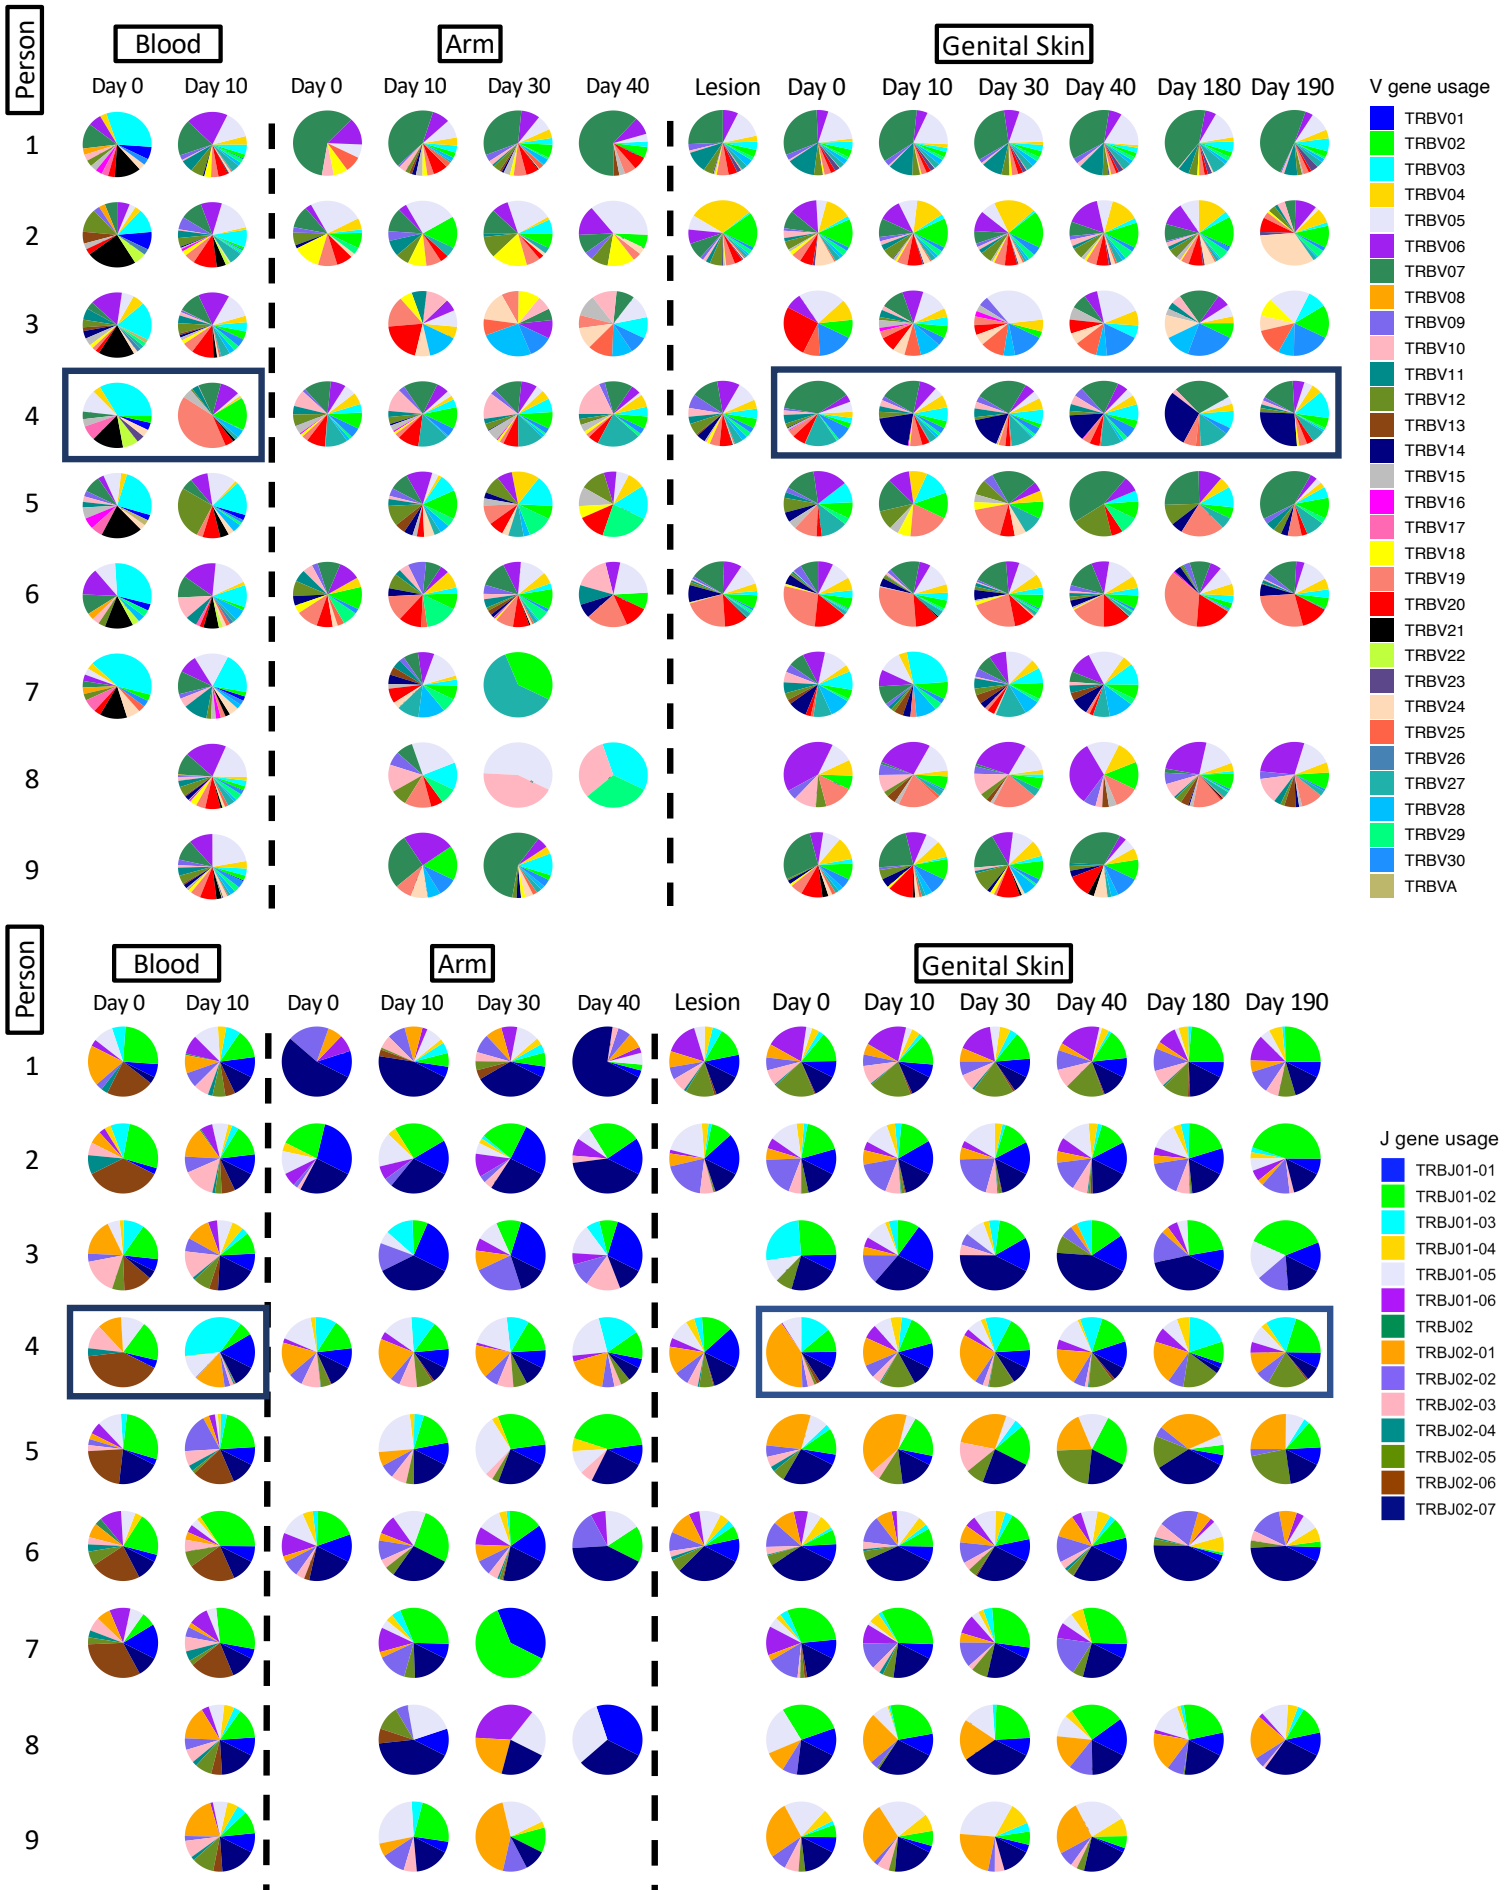

Supplementary Figure 4.

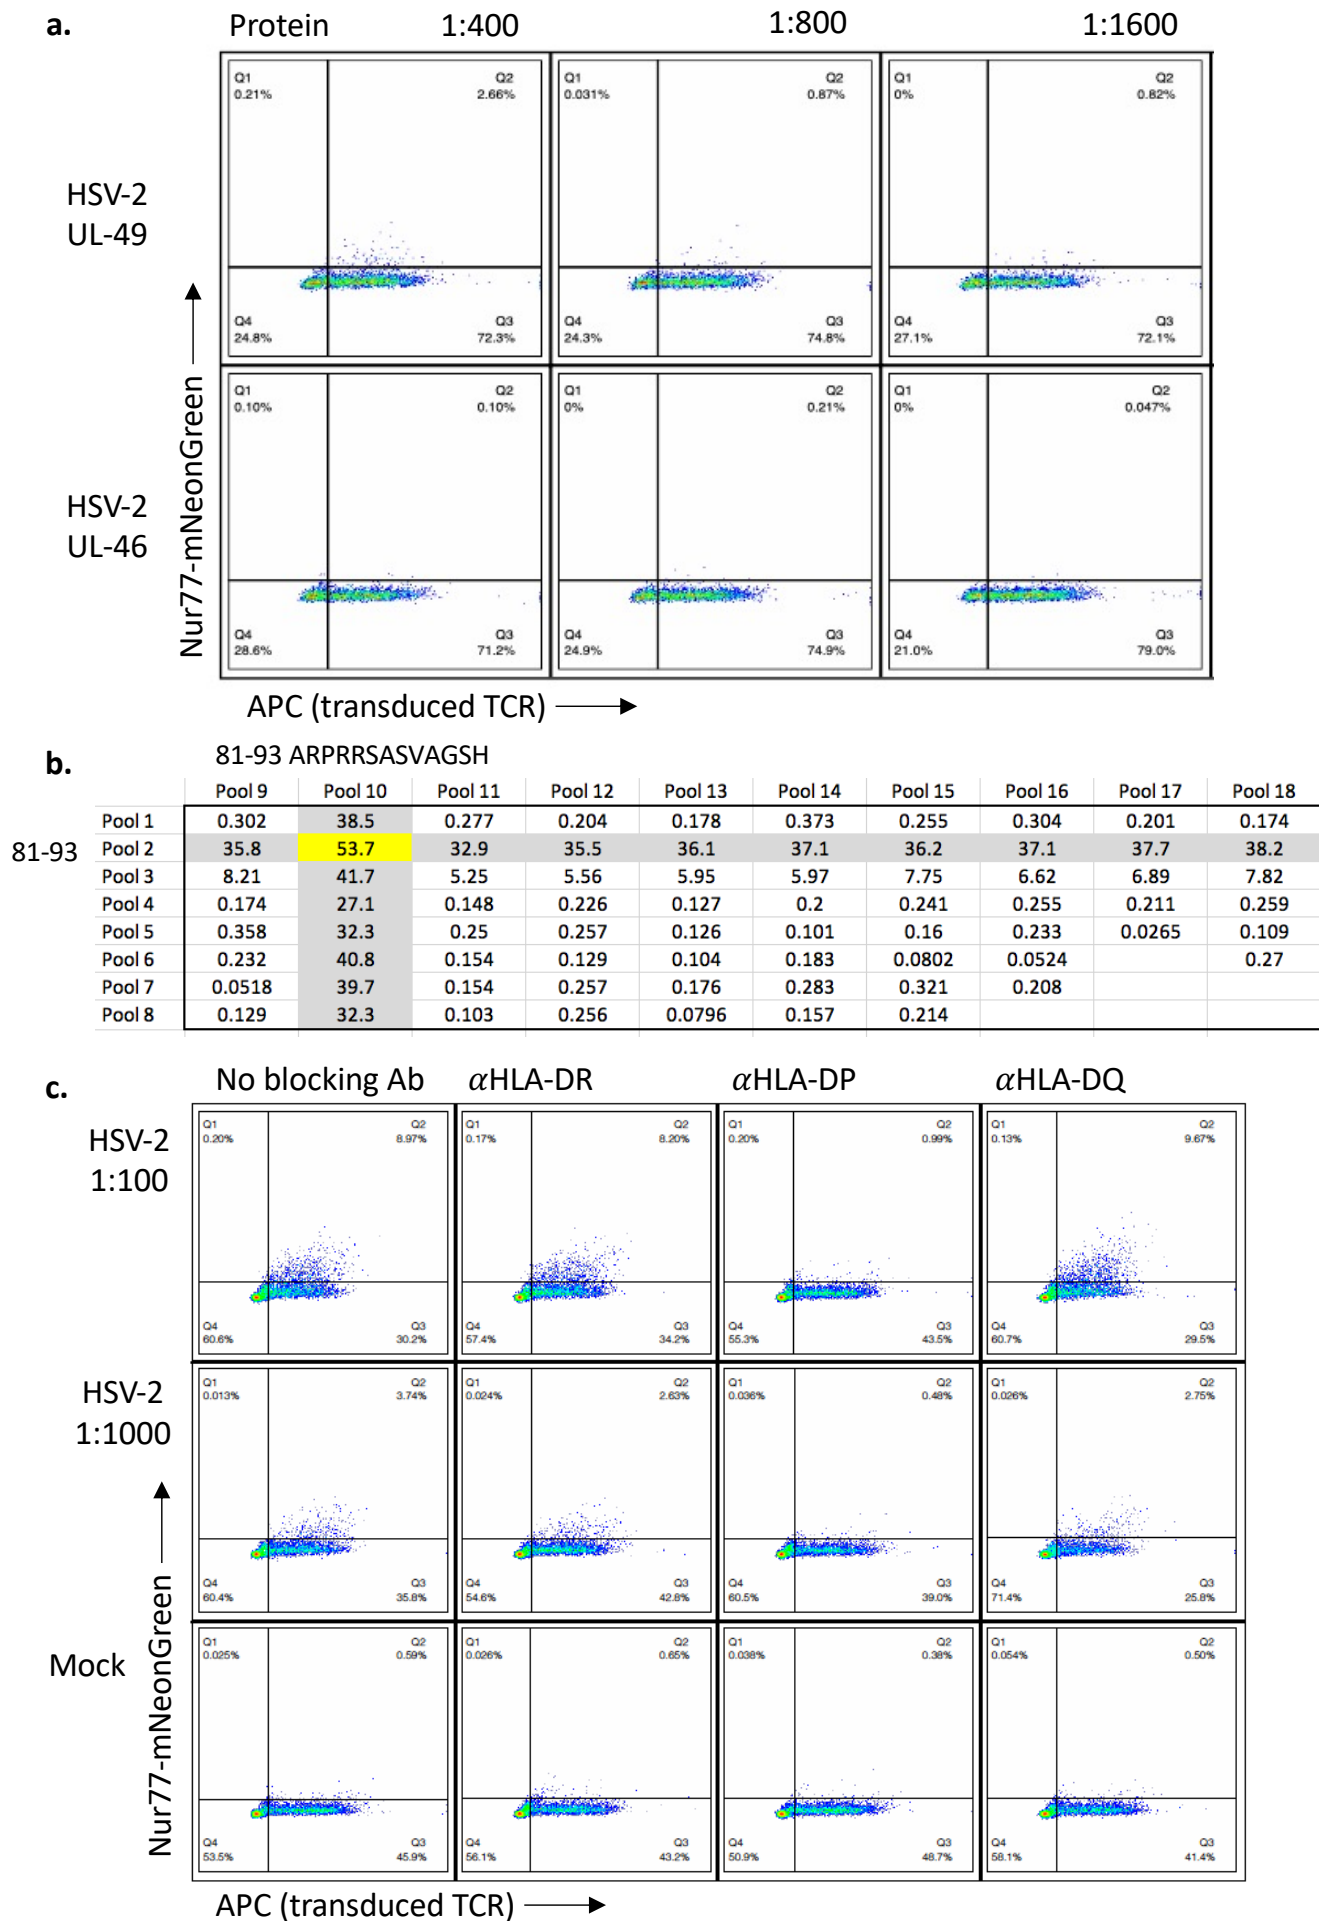

Supplementary Figure 5.

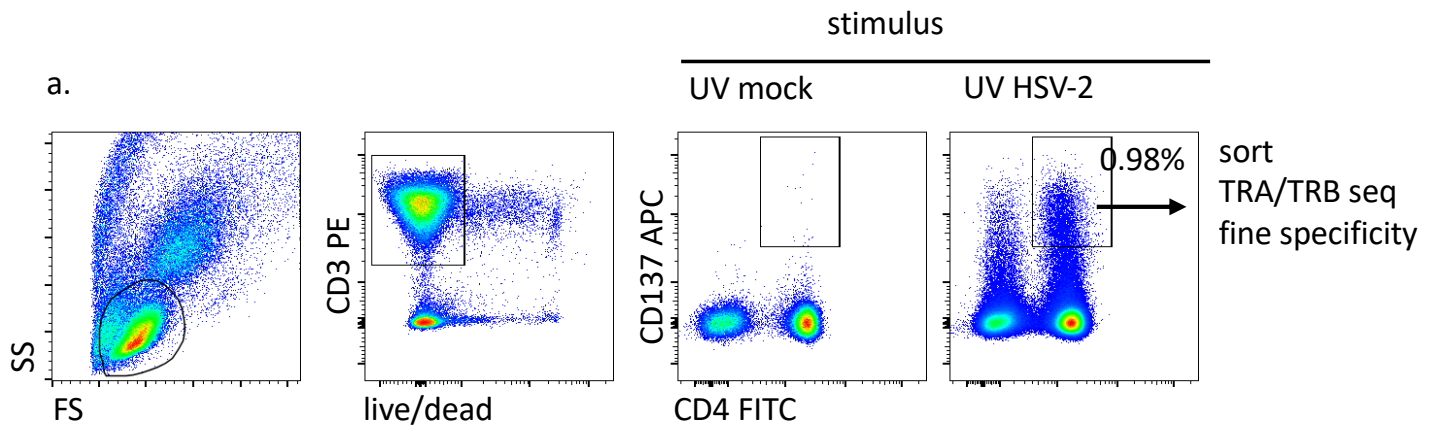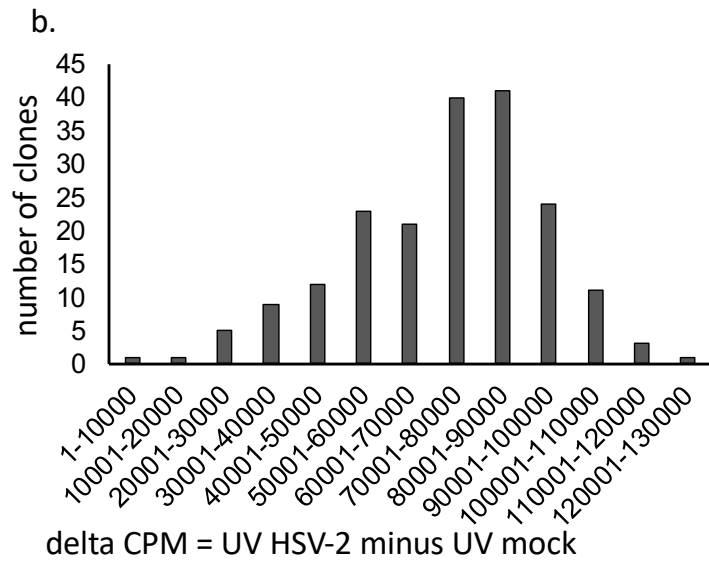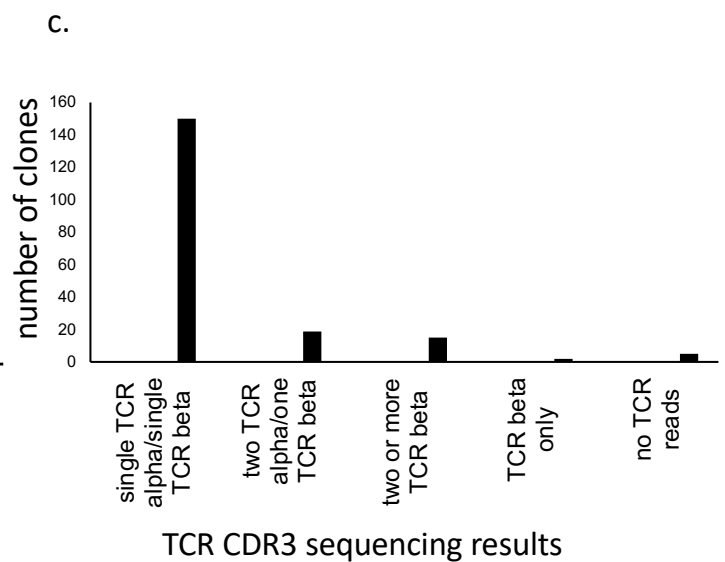

Supplement: jciinsight-9-179010-s157.pdf [file jciinsight-9-179010-s157.pdf]
